# Supplementary material for: The role of APETALA1 in petal number robustness
Source: eLife journal article supplement (doi:10.7554/elife.39399), 2018-10-18
Supplement: supp [file elife_poa_e39399_Figure_1_figure_supplement_2.docx]

| Petal position (relative to SAM) | Frequency of observed petals (%) |
| --- | --- |
| Left  Right  Adaxial  Abaxial | 52  48  32  68 |
