# Supplementary material for: The role of APETALA1 in petal number robustness
Source: eLife journal article supplement (doi:10.7554/elife.39399), 2018-10-18
Supplement: supp [file elife_poa_e39399_Figure_4_figure_supplement_4.docx]

|  |  | **Physical boundary (µm)** | | | | ***AP1* expression boundary (µm)** | | | |
| --- | --- | --- | --- | --- | --- | --- | --- | --- | --- |
| Genotype | ***AtAP1::***  ***AtAP1:GFP*** | Abaxial left | Abaxial right | Adaxial left | Adaxial right | Abaxial left | Abaxial right | Adaxial left | Adaxial right |
| Sample | 1 | 29,39 | 23,76 | 25,87 | 21,43 | 33,77 | 29,49 | 30,10 | 27,89 |
| 2 | 24,71 | 23,48 | 24,96 | 24,64 | 29,65 | 24,47 | 32,85 | 32,13 |
| 3 | 27,19 | 27,74 | 25,34 | 26,56 | 29,40 | 28,42 | 23,28 | 26,50 |
| 4 | 21,84 | 22,97 | 24,46 | 24,24 | 26,63 | 28,73 | 29,78 | 25,14 |
| 5 | 23,27 | 23,73 | 27,99 | 28,30 | 26,32 | 24,56 | 36,72 | 27,07 |
| 6 | 27,29 | 26,77 | 27,55 | 30,74 | 31,19 | 31,71 | 32,77 | 35,21 |
| 7 | 25,58 | 24,04 | 27,20 | 24,10 | 28,98 | 29,55 | 29,91 | 29,91 |
|  | **average** | **25,61** | **24,64** | **26,20** | **25,72** | **29,42** | **28,13** | **30,77** | **29,12** |
|  |  |  |  |  |  |  |  |  |  |
|  |  | **Physical boundary (µm)** | | | | ***AP1* expression boundary (µm)** | | | |
| Genotype | ***ChAP1::***  ***ChAP1:GFP*** | Abaxial left | Abaxial right | Adaxial left | Adaxial right | Abaxial left | Abaxial right | Adaxial left | Adaxial right |
| Sample | 1 | 23,75 | 21,17 | 27,53 | 25,14 | 22,32 | 19,84 | 23,02 | 24,66 |
| 2 | 23,32 | 20,93 | 25,56 | 23,15 | 26,21 | 23,51 | 28,24 | 24,69 |
| 3 | 25,36 | 26,07 | 28,13 | 28,03 | 27,82 | 23,67 | 24,26 | 25,74 |
| 4 | 24,48 | 21,52 | 24,42 | 24,60 | 24,25 | 24,96 | 27,67 | 21,83 |
| 5 | 23,43 | 18,03 | 26,02 | 27,21 | 25,35 | 21,10 | 24,84 | 29,64 |
| 6 | 22,74 | 22,46 | 24,96 | 27,30 | 22,09 | 20,41 | 25,23 | 22,36 |
| 7 | 26,35 | 25,42 | 27,78 | 31,37 | 27,43 | 24,80 | 26,24 | 32,48 |
|  | **average** | **24,21** | **22,23** | **26,34** | **26,69** | **25,07** | **22,61** | **25,64** | **25,91** |
