# Supplementary material for: The role of APETALA1 in petal number robustness
Source: eLife journal article supplement (doi:10.7554/elife.39399), 2018-10-18
Supplement: supp [file elife_poa_e39399_Figure_4_figure_supplement_5.docx]

|  |  |  |  | **Physical boundary (µm)** | | | | ***AP1* expression boundary (µm)** | | | |
| --- | --- | --- | --- | --- | --- | --- | --- | --- | --- | --- | --- |
| Genotype | Sample | Picture | Measurement | Abaxial left | Abaxial right | Adaxial left | Adaxial right | Abaxial left | Abaxial right | Adaxial left | Adaxial right |
| *AtAP1::*  *AtAP1:GFP* | 1 | 1 | 1 | 29,393 | 23,758 | 25,869 | 21,435 | 33,773 | 29,487 | 30,097 | 27,888 |
| 2 | 30,221 | 24,381 | 27,334 | 22,045 | 34,308 | 31,867 | 31,590 | 27,273 |
| 3 | 28,451 | 23,715 | 26,208 | 22,078 | 33,488 | 30,911 | 31,999 | 27,351 |
| **average** | **29,355** | **23,951** | **26,470** | **21,853** | **33,856** | **30,755** | **31,229** | **27,504** |
| 2 | 1 | 26,030 | 21,044 | 26,581 | 23,215 | 32,271 | 28,993 | 33,327 | 30,579 |
| 2 | 26,783 | 20,624 | 28,600 | 24,759 | 32,689 | 30,146 | 34,152 | 30,479 |
| 3 | 26,572 | 21,156 | 27,201 | 23,016 | 31,709 | 30,000 | 32,776 | 29,875 |
| **average** | **26,461** | **20,941** | **27,461** | **23,663** | **32,223** | **29,713** | **33,418** | **30,311** |
|  | **total average** | **27,908** | **22,446** | **26,966** | **22,758** | **33,040** | **30,234** | **32,323** | **28,908** |
