# Supplementary material for: The role of APETALA1 in petal number robustness
Source: eLife journal article supplement (doi:10.7554/elife.39399), 2018-10-18
Supplement: supp [file elife_poa_e39399_Figure_4_figure_supplement_6.docx]

|  |  | **Flower…** | | **Meristem…** | | |
| --- | --- | --- | --- | --- | --- | --- |
| Genotype | ***AtAP1::AtAP1:GFP*** | Lateral length (µm) | Median length (µm) | Lateral length (µm) | Median length (µm) | Area (µm2) |
| Sample | 1 | 147,66 | 130,88 | 86,92 | 67,85 | 226,20 |
| 2 | 129,67 | 122,36 | 76,87 | 59,39 | 169,11 |
| 3 | 150,17 | 134,08 | 82,04 | 65,27 | 212,83 |
| 4 | 138,14 | 123,45 | 82,71 | 58,35 | 199,99 |
| 5 | 153,39 | 136,49 | 87,12 | 67,84 | 243,03 |
| 6 | 139,49 | 131,47 | 81,03 | 67,69 | 213,84 |
| 7 | 149,83 | 136,29 | 85,53 | 65,19 | 216,52 |
|  | **average** | **144,05** | **130,71** | **83,17** | **64,51** | **211,65** |
|  |  |  |  |  |  |  |
|  |  | **Flower…** | | **Meristem…** | | |
| Genotype | ***ChAP1::ChAP1:GFP*** | Lateral length (µm) | Median length (µm) | Lateral length (µm) | Median length (µm) | Area (µm2) |
| Sample | 1 | 122,88 | 124,77 | 63,56 | 62,03 | 174,72 |
| 2 | 133,87 | 133,77 | 78,52 | 70,26 | 232,67 |
| 3 | 144,75 | 139,53 | 83,05 | 70,03 | 248,74 |
| 4 | 139,66 | 132,17 | 82,23 | 68,56 | 230,66 |
| 5 | 134,20 | 133,38 | 74,88 | 65,47 | 206,80 |
| 6 | 136,64 | 135,13 | 78,49 | 69,58 | 239,11 |
| 7 | 151,21 | 147,69 | 88,23 | 71,41 | 253,52 |
|  | **average** | **137,60** | **135,21** | **78,42** | **68,19** | **226,60** |
