# Supplementary material for: The role of APETALA1 in petal number robustness
Source: eLife journal article supplement (doi:10.7554/elife.39399), 2018-10-18
Supplement: supp [file elife_poa_e39399_Figure_5_figure_supplement_1.docx]

|  | Wild-type (Ox) | *gAtAP1-GFP* |
| --- | --- | --- |
| Petal number (± s.e.m.)  Average seed weight (in mg, ± s.e.m.)  Number of seeds per plant (± s.e.m.) | 2.39 (± 0.06)  0.077 (± 0.0015)  3722 (± 223) | 3.66 (± 0.03)  0.078 (± 0.0013)  4003 (± 300) |
